# Supplementary material for: Microcapsules with low content of formaldehyde: preparation and characterization
Source: Royal Society of Chemistry journal article supplement (doi:10.1039/b902832c), 2009-01-01
Supplement: b902832c.pdf [file b902832c.pdf]

Force vs. probe moving distance for compressing single microcapsules to rupture using micromanipulation for microcapsules **B**, **C**, and **E**.

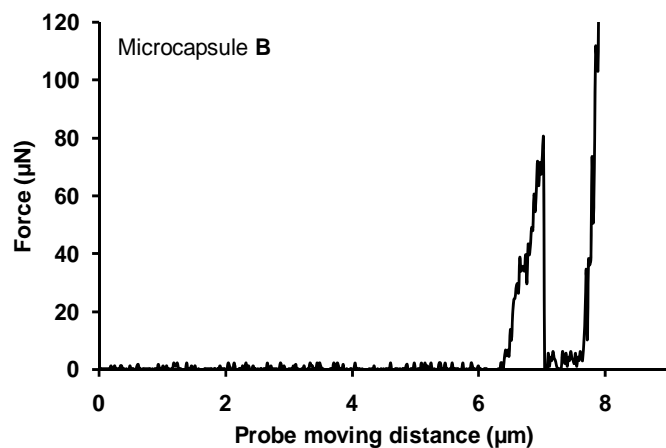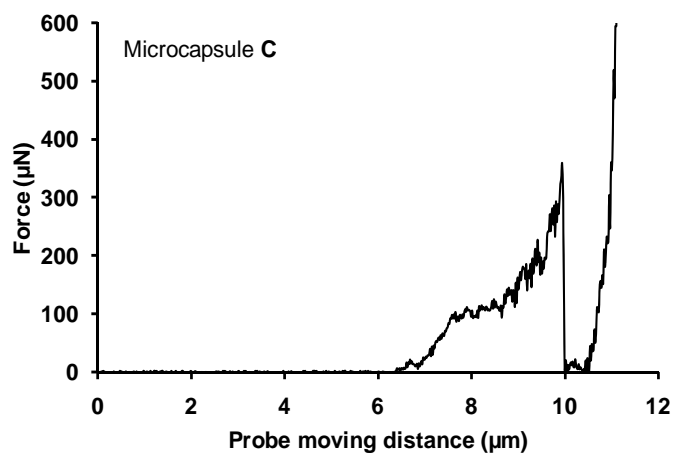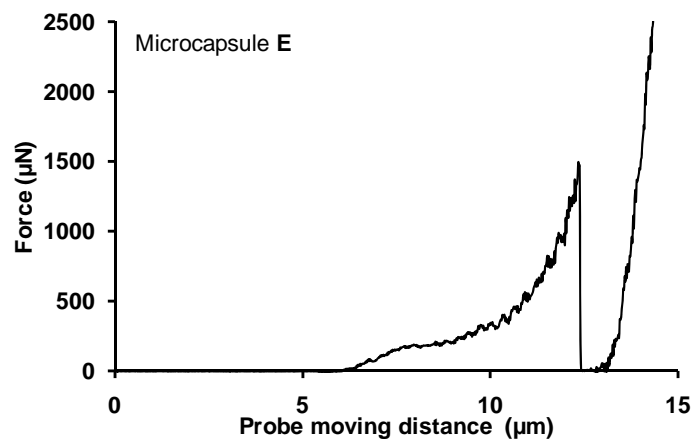

GC graphs of calibration for encapsulation efficiency measurement

Different concentrations (0.6 mg/ml, 1.0 mg/ml, 2.0 mg/ml, 6.0 mg/ml and 9.0 mg/ml) of perfume oil dissolves in hexane were prepared, and analysed by GC (see paper experimental section, encapsulation efficiency measurement, P3).

Concentration: 0.6 mg/ml

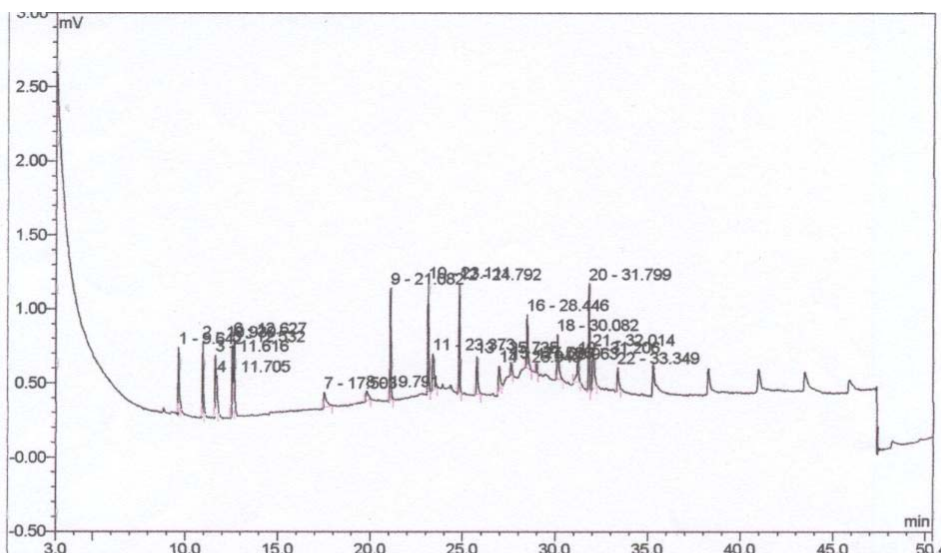

| No. | Ret. Time<br>min | Peak Name | Height<br>mV | Area<br>mV*min | Rel. Area<br>% | Amount | Type |
|-----|------------------|-----------|--------------|----------------|----------------|--------|------|
| 1   | 9.64             | n.a.      | 0.430        | 0.025          | 4.32           | n.a.   | BMB* |
| 2   | 10.94            | n.a.      | 0.504        | 0.029          | 5.04           | n.a.   | BMB* |
| 3   | 11.62            | n.a.      | 0.407        | 0.026          | 4.41           | n.a.   | BM * |
| 4   | 11.71            | n.a.      | 0.262        | 0.018          | 3.03           | n.a.   | MB*  |
| 5   | 12.53            | n.a.      | 0.470        | 0.030          | 5.11           | n.a.   | BM * |
| 6   | 12.63            | n.a.      | 0.510        | 0.030          | 5.21           | n.a.   | MB*  |
| 7   | 17.50            | n.a.      | 0.111        | 0.019          | 3.31           | n.a.   | BMB* |
| 8   | 19.79            | n.a.      | 0.076        | 0.012          | 2.14           | n.a.   | BMB* |
| 9   | 21.08            | n.a.      | 0.763        | 0.046          | 7.83           | n.a.   | BMB* |
| 10  | 23.11            | n.a.      | 0.747        | 0.044          | 7.54           | n.a.   | BMB* |
| 11  | 23.37            | n.a.      | 0.249        | 0.027          | 4.68           | n.a.   | BMB* |
| 12  | 24.79            | n.a.      | 0.739        | 0.041          | 7.06           | n.a.   | BMB* |
| 13  | 25.74            | n.a.      | 0.255        | 0.023          | 4.00           | n.a.   | BMB* |

|               |       |      |              |              |               |              |      |
|---------------|-------|------|--------------|--------------|---------------|--------------|------|
| 14            | 26.94 | n.a. | 0.171        | 0.019        | 3.30          | n.a.         | BMB* |
| 15            | 27.59 | n.a. | 0.096        | 0.008        | 1.42          | n.a.         | BMB* |
| 16            | 28.45 | n.a. | 0.361        | 0.031        | 5.34          | n.a.         | BMB* |
| 17            | 28.96 | n.a. | 0.071        | 0.004        | 0.75          | n.a.         | BMB* |
| 18            | 30.08 | n.a. | 0.303        | 0.033        | 5.58          | n.a.         | BMB* |
| 19            | 31.21 | n.a. | 0.174        | 0.021        | 3.66          | n.a.         | BMB* |
| 20            | 31.80 | n.a. | 0.726        | 0.044        | 7.49          | n.a.         | BMB* |
| 21            | 32.01 | n.a. | 0.272        | 0.034        | 5.87          | n.a.         | BMB* |
| 22            | 33.35 | n.a. | 0.163        | 0.017        | 2.93          | n.a.         | BMB* |
| <b>Total:</b> |       |      | <b>7.859</b> | <b>0.584</b> | <b>100.00</b> | <b>0.000</b> |      |

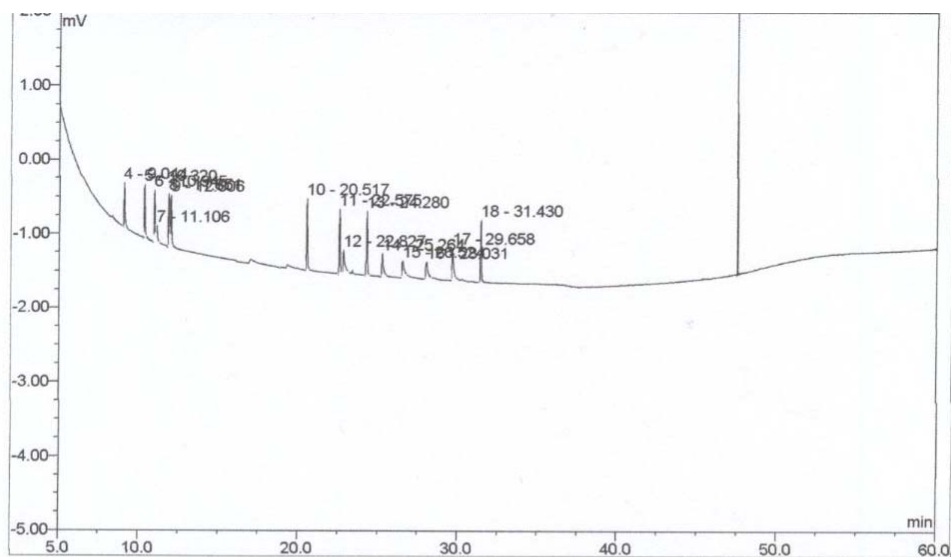

| No. | Ret. Time<br>min | Peak Name | Height<br>mV | Area<br>mV*min | Rel. Area<br>% | Amount | Type |
|-----|------------------|-----------|--------------|----------------|----------------|--------|------|
| 1   | 2.88             | n.a.      | 1245.223     | 81.179         | 68.02          | n.a.   | BM   |
| 2   | 2.91             | n.a.      | 1245.219     | 17.400         | 14.58          | n.a.   | M    |
| 3   | 3.05             | n.a.      | 293.729      | 20.094         | 16.84          | n.a.   | MB   |
| 4   | 9.04             | n.a.      | 0.580        | 0.034          | 0.03           | n.a.   | BMB* |
| 5   | 10.32            | n.a.      | 0.693        | 0.043          | 0.04           | n.a.   | BMB* |
| 6   | 10.94            | n.a.      | 0.696        | 0.054          | 0.05           | n.a.   | BM * |
| 7   | 11.11            | n.a.      | 0.221        | 0.020          | 0.02           | n.a.   | MB*  |
| 8   | 11.85            | n.a.      | 0.701        | 0.054          | 0.04           | n.a.   | BM * |
| 9   | 12.01            | n.a.      | 0.675        | 0.046          | 0.04           | n.a.   | MB*  |
| 10  | 20.52            | n.a.      | 0.956        | 0.065          | 0.05           | n.a.   | BMB* |
| 11  | 22.57            | n.a.      | 0.870        | 0.064          | 0.05           | n.a.   | BMB* |
| 12  | 22.83            | n.a.      | 0.304        | 0.036          | 0.03           | n.a.   | bMB* |
| 13  | 24.28            | n.a.      | 0.864        | 0.059          | 0.05           | n.a.   | BMB* |

|               |       |      |          |         |        |       |      |
|---------------|-------|------|----------|---------|--------|-------|------|
| 14            | 25.26 | n.a. | 0.295    | 0.031   | 0.03   | n.a.  | BMB* |
| 15            | 26.52 | n.a. | 0.211    | 0.030   | 0.03   | n.a.  | BMB* |
| 16            | 28.03 | n.a. | 0.222    | 0.030   | 0.03   | n.a.  | BMB* |
| 17            | 29.66 | n.a. | 0.418    | 0.046   | 0.04   | n.a.  | BMB* |
| 18            | 31.43 | n.a. | 0.840    | 0.062   | 0.05   | n.a.  | BMB* |
| <b>Total:</b> |       |      | 2792.717 | 119.349 | 100.00 | 0.000 |      |

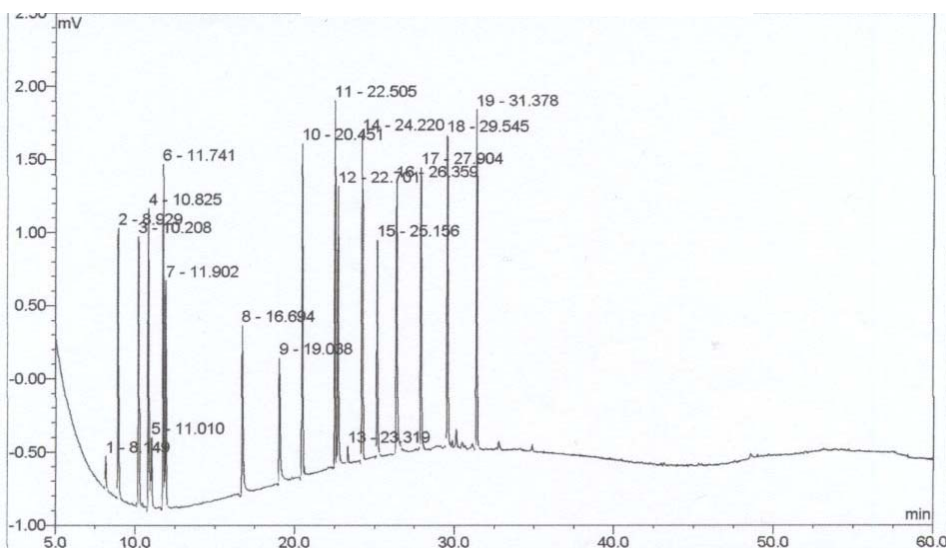

| No.           | Ret.Time<br>min | Peak Name | Height<br>mV | Area<br>mV*min | Rel.Area<br>% | Amount | Type |
|---------------|-----------------|-----------|--------------|----------------|---------------|--------|------|
| 1             | 8.15            | n.a.      | 0.217        | 0.012          | 0.55          | n.a.   | BMB* |
| 2             | 8.93            | n.a.      | 1.835        | 0.101          | 4.84          | n.a.   | BMB* |
| 3             | 10.21           | n.a.      | 1.836        | 0.107          | 5.16          | n.a.   | BMB* |
| 4             | 10.83           | n.a.      | 2.046        | 0.132          | 6.32          | n.a.   | BM * |
| 5             | 11.01           | n.a.      | 0.477        | 0.036          | 1.74          | n.a.   | MB*  |
| 6             | 11.74           | n.a.      | 2.343        | 0.136          | 6.51          | n.a.   | BM * |
| 7             | 11.90           | n.a.      | 1.540        | 0.101          | 4.83          | n.a.   | MB*  |
| 8             | 16.69           | n.a.      | 1.146        | 0.096          | 4.62          | n.a.   | BMB* |
| 9             | 19.04           | n.a.      | 0.841        | 0.073          | 3.49          | n.a.   | BMB* |
| 10            | 20.45           | n.a.      | 2.278        | 0.149          | 7.17          | n.a.   | BMB* |
| 11            | 22.51           | n.a.      | 2.493        | 0.150          | 7.20          | n.a.   | BMB* |
| 12            | 22.70           | n.a.      | 1.897        | 0.131          | 6.29          | n.a.   | BMB* |
| 13            | 23.32           | n.a.      | 0.115        | 0.008          | 0.39          | n.a.   | BMB* |
| 14            | 24.22           | n.a.      | 2.236        | 0.142          | 6.83          | n.a.   | BMB* |
| 15            | 25.16           | n.a.      | 1.463        | 0.102          | 4.92          | n.a.   | BMB* |
| 16            | 26.36           | n.a.      | 1.858        | 0.163          | 7.80          | n.a.   | BMB* |
| 17            | 27.90           | n.a.      | 1.902        | 0.128          | 6.15          | n.a.   | BMB* |
| 18            | 29.55           | n.a.      | 2.127        | 0.159          | 7.62          | n.a.   | BMB* |
| 19            | 31.38           | n.a.      | 2.310        | 0.158          | 7.59          | n.a.   | BMB* |
| <b>Total:</b> |                 |           | 30.960       | 2.083          | 100.00        | 0.000  |      |

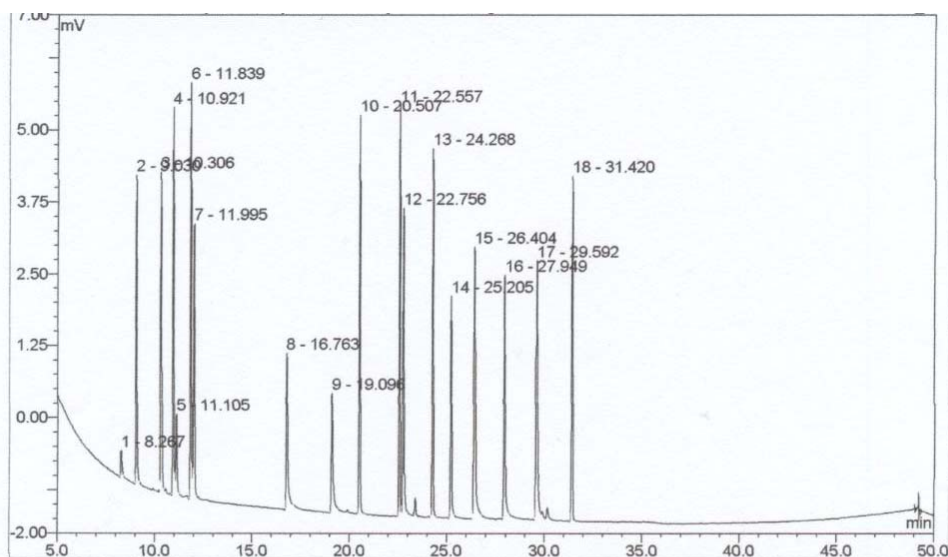

| No.           | Ret.Time<br>min | Peak Name | Height<br>mV | Area<br>mV*min | Rel.Area<br>% | Amount | Type |
|---------------|-----------------|-----------|--------------|----------------|---------------|--------|------|
| 1             | 8.27            | n.a.      | 0.439        | 0.028          | 0.49          | n.a.   | BMB* |
| 2             | 9.03            | n.a.      | 5.344        | 0.312          | 5.43          | n.a.   | BMB* |
| 3             | 10.31           | n.a.      | 5.513        | 0.328          | 5.69          | n.a.   | BMB* |
| 4             | 10.92           | n.a.      | 6.713        | 0.403          | 7.01          | n.a.   | BM * |
| 5             | 11.11           | n.a.      | 1.374        | 0.103          | 1.78          | n.a.   | MB*  |
| 6             | 11.84           | n.a.      | 7.222        | 0.413          | 7.17          | n.a.   | BM * |
| 7             | 11.99           | n.a.      | 4.748        | 0.314          | 5.45          | n.a.   | MB*  |
| 8             | 16.76           | n.a.      | 2.686        | 0.237          | 4.11          | n.a.   | BMB* |
| 9             | 19.10           | n.a.      | 2.042        | 0.185          | 3.21          | n.a.   | BMB* |
| 10            | 20.51           | n.a.      | 6.925        | 0.446          | 7.75          | n.a.   | BMB* |
| 11            | 22.56           | n.a.      | 7.134        | 0.441          | 7.67          | n.a.   | BMB* |
| 12            | 22.76           | n.a.      | 5.307        | 0.358          | 6.21          | n.a.   | bMB* |
| 13            | 24.27           | n.a.      | 6.400        | 0.402          | 6.98          | n.a.   | BMB* |
| 14            | 25.20           | n.a.      | 3.820        | 0.274          | 4.76          | n.a.   | BMB* |
| 15            | 26.40           | n.a.      | 4.709        | 0.417          | 7.24          | n.a.   | BMB* |
| 16            | 27.95           | n.a.      | 4.191        | 0.296          | 5.14          | n.a.   | BMB* |
| 17            | 29.59           | n.a.      | 4.446        | 0.381          | 6.62          | n.a.   | BMB* |
| 18            | 31.42           | n.a.      | 5.994        | 0.419          | 7.29          | n.a.   | BMB* |
| <b>Total:</b> |                 |           | 85.006       | 5.756          | 100.00        | 0.000  |      |

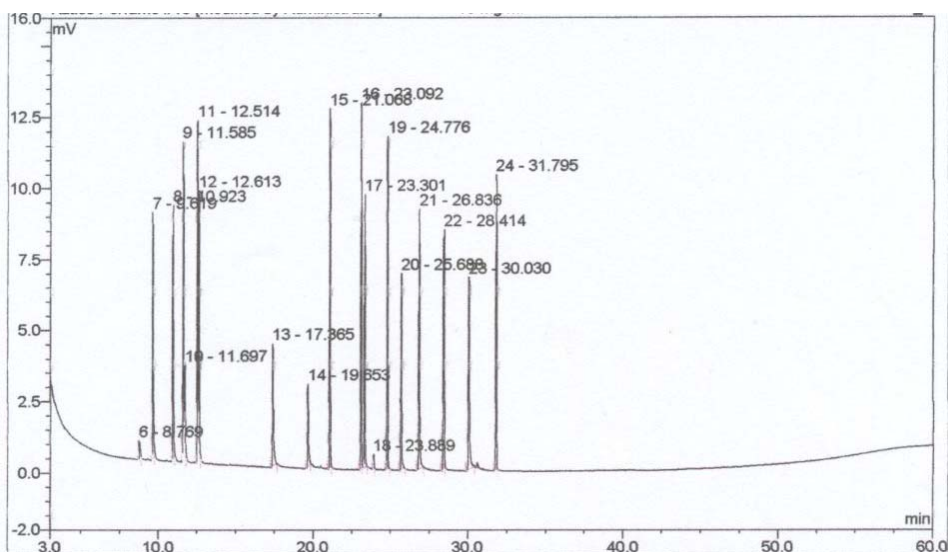

| No.           | Ret. Time<br>min | Peak Name | Height<br>mV | Area<br>mV*min | Rel. Area<br>% | Amount | Type |
|---------------|------------------|-----------|--------------|----------------|----------------|--------|------|
| 1             | 2.29             | n.a.      | 459.704      | 9.318          | 7.55           | n.a.   | BM   |
| 2             | 2.32             | n.a.      | 98.321       | 1.182          | 0.96           | n.a.   | Ru   |
| 3             | 2.39             | n.a.      | 1240.395     | 78.327         | 63.47          | n.a.   | M    |
| 4             | 2.42             | n.a.      | 1055.392     | 24.496         | 19.85          | n.a.   | MB   |
| 5             | 2.45             | n.a.      | 98.784       | 1.492          | 1.21           | n.a.   | Rd   |
| 6             | 8.77             | n.a.      | 0.656        | 0.045          | 0.04           | n.a.   | BMB* |
| 7             | 9.62             | n.a.      | 8.715        | 0.479          | 0.39           | n.a.   | BMB* |
| 8             | 10.92            | n.a.      | 8.935        | 0.495          | 0.40           | n.a.   | BMB* |
| 9             | 11.59            | n.a.      | 11.253       | 0.599          | 0.49           | n.a.   | BM*  |
| 10            | 11.70            | n.a.      | 3.334        | 0.202          | 0.16           | n.a.   | MB*  |
| 11            | 12.51            | n.a.      | 12.031       | 0.590          | 0.48           | n.a.   | BM*  |
| 12            | 12.61            | n.a.      | 9.509        | 0.530          | 0.43           | n.a.   | MB*  |
| 13            | 17.37            | n.a.      | 4.318        | 0.330          | 0.27           | n.a.   | BMB* |
| 14            | 19.65            | n.a.      | 2.936        | 0.220          | 0.18           | n.a.   | BMB* |
| 15            | 21.07            | n.a.      | 12.644       | 0.678          | 0.55           | n.a.   | BMB* |
| 16            | 23.09            | n.a.      | 12.865       | 0.657          | 0.53           | n.a.   | BMB* |
| 17            | 23.30            | n.a.      | 9.627        | 0.522          | 0.42           | n.a.   | BMB* |
| 18            | 23.89            | n.a.      | 0.509        | 0.029          | 0.02           | n.a.   | BMB* |
| 19            | 24.78            | n.a.      | 11.723       | 0.604          | 0.49           | n.a.   | BMB* |
| 20            | 25.69            | n.a.      | 6.908        | 0.413          | 0.33           | n.a.   | BMB* |
| 21            | 26.84            | n.a.      | 9.163        | 0.604          | 0.49           | n.a.   | BMB* |
| 22            | 28.41            | n.a.      | 8.437        | 0.462          | 0.37           | n.a.   | BMB* |
| 23            | 30.03            | n.a.      | 6.778        | 0.524          | 0.42           | n.a.   | BMB* |
| 24            | 31.79            | n.a.      | 10.384       | 0.611          | 0.50           | n.a.   | BMB* |
| <b>Total:</b> |                  |           | 3103.320     | 123.410        | 100.00         | 0.000  |      |

**Calibration curve**

10 peaks were selected (10 peaks with the largest area) from the previous calibration data, and the calibration curve for each peak (labelled base on their retention time) was plotted using area vs. concentration.

**Calculate the oil concentration from the calibration curves**

The hexane aliquots (1 $\mu$ l) from the encapsulation efficiency experiment (see paper experimental section, encapsulation efficiency measurement, P2) were analysed by GC, to give the area of the 10 selected retention time. These areas were then read off on the 10 calibration graphs to give 10 concentrations of core oil which were then averaged.

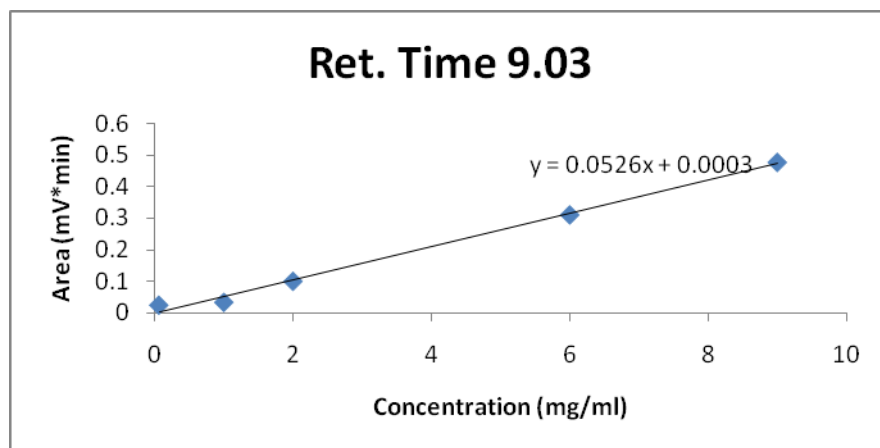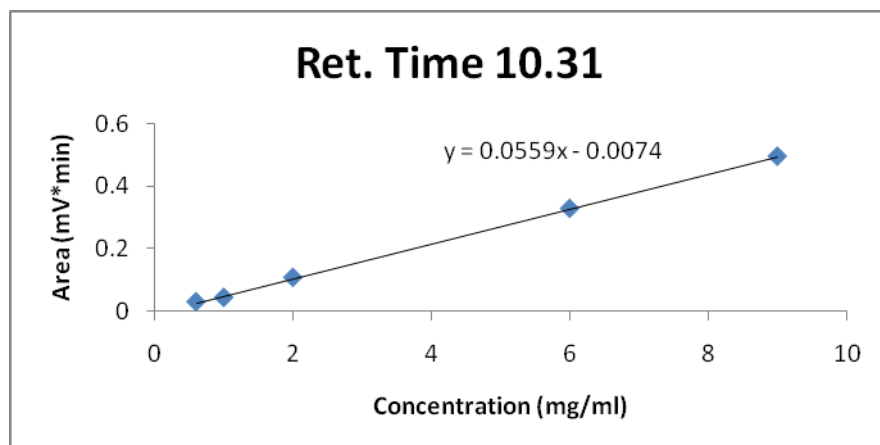

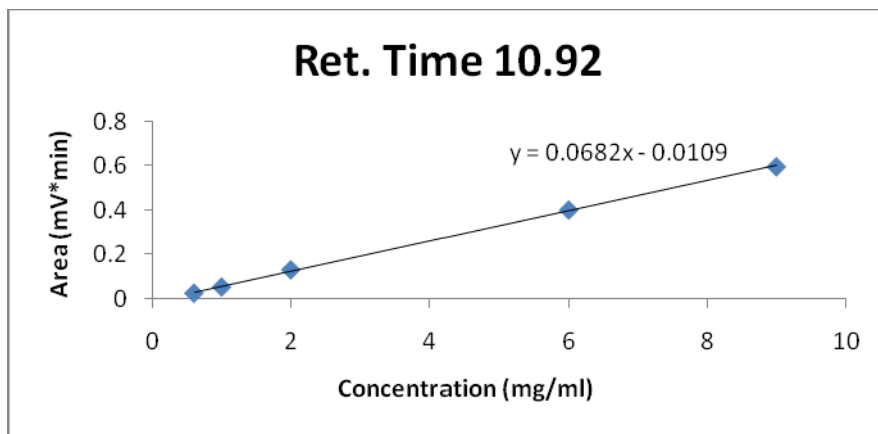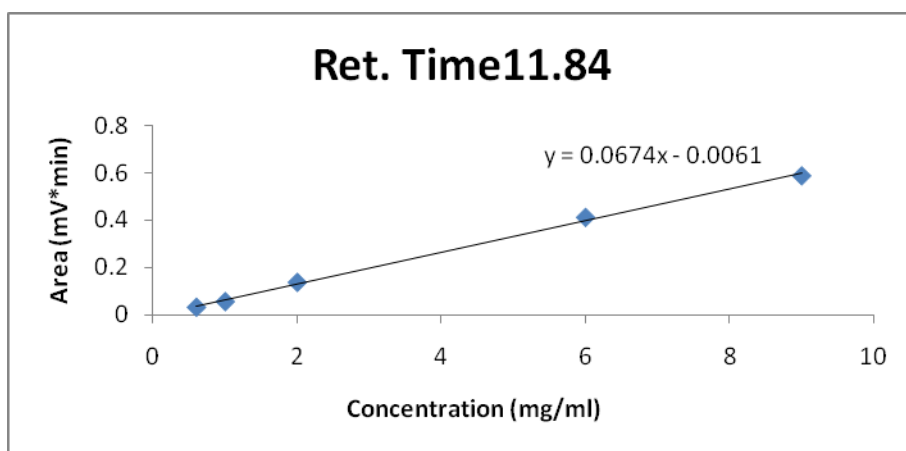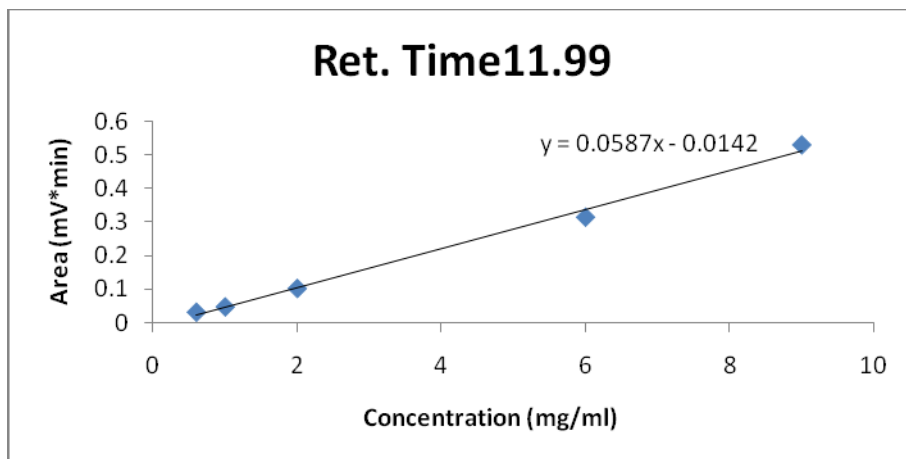



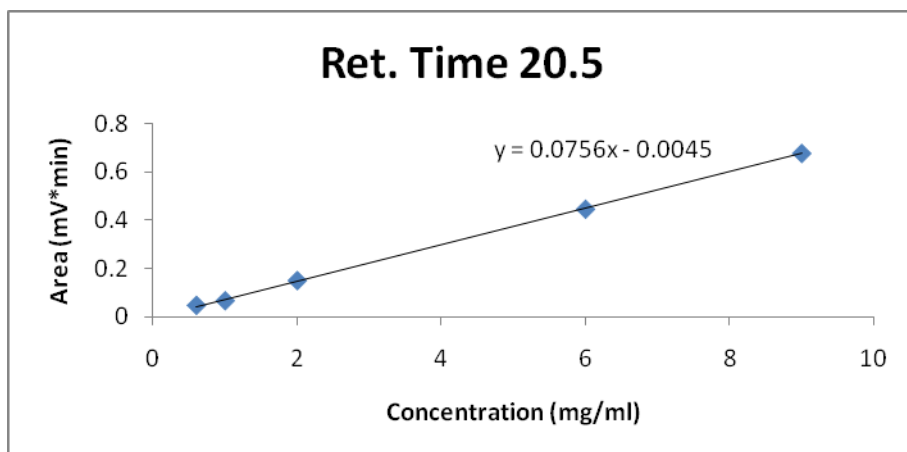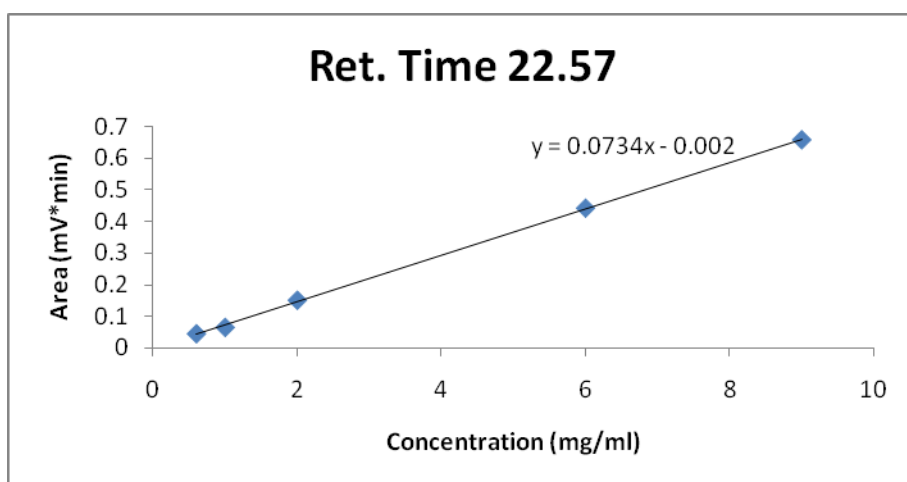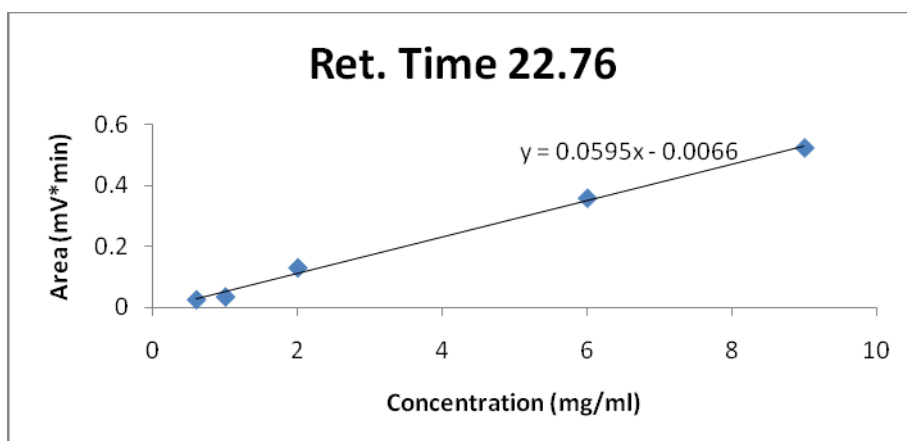

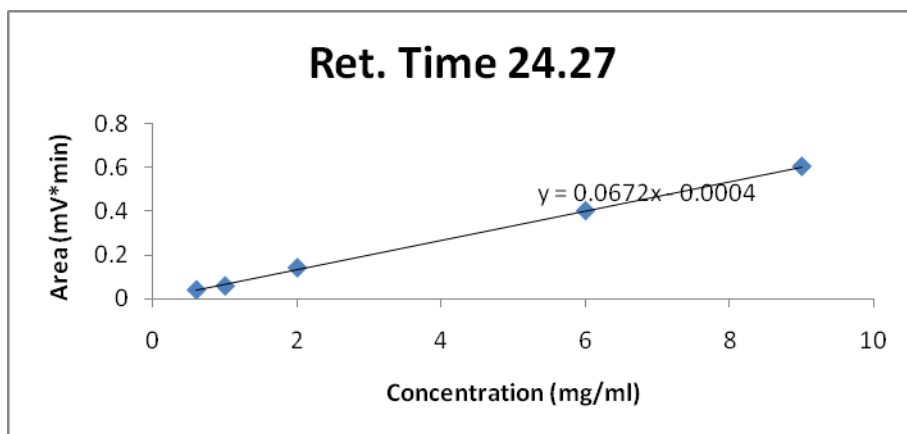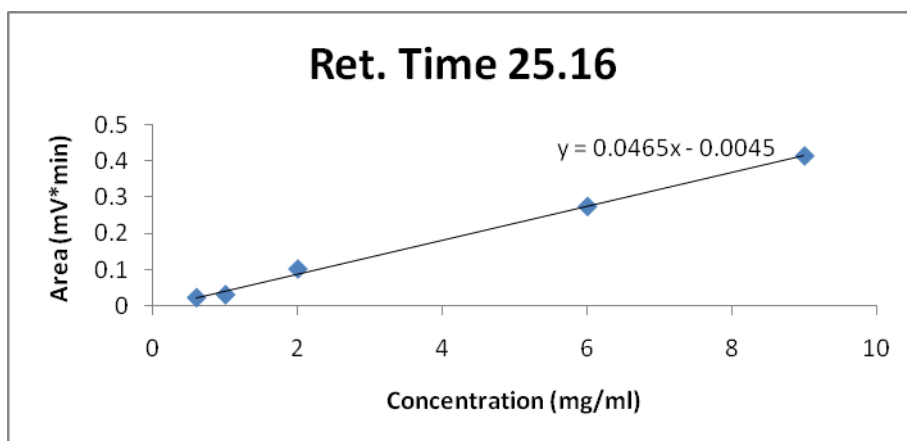

GC graphs for the encapsulation efficiency measurement for microcapsules A (1  $\mu$ l sample injection).

First extraction:

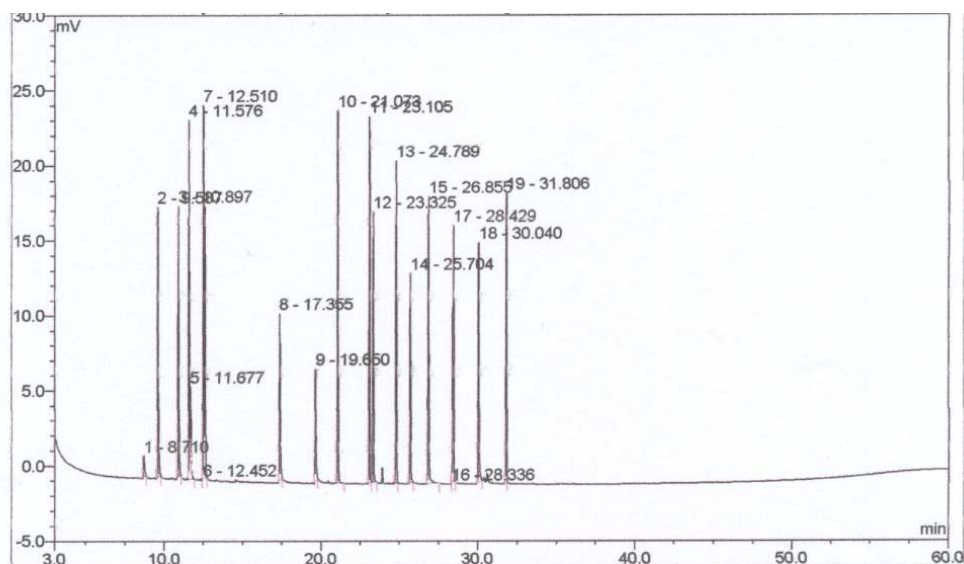

| No.           | Ret. Time<br>min | Peak Name | Height<br>mV   | Area<br>mV*min | Rel. Area<br>% | Amount       | Type |
|---------------|------------------|-----------|----------------|----------------|----------------|--------------|------|
| 1             | 8.71             | n.a.      | 1.454          | 0.101          | 0.61           | n.a.         | BMB* |
| 2             | 9.59             | n.a.      | 18.067         | 0.943          | 5.69           | n.a.         | BMB* |
| 3             | 10.90            | n.a.      | 18.082         | 0.951          | 5.74           | n.a.         | BMB* |
| 4             | 11.58            | n.a.      | 23.945         | 1.352          | 8.16           | n.a.         | BMB  |
| 5             | 11.68            | n.a.      | 4.509          | 0.192          | 1.16           | n.a.         | Rd   |
| 6             | 12.45            | n.a.      | 0.000          | 0.000          | 0.00           | n.a.         | BMB* |
| 7             | 12.51            | n.a.      | 24.883         | 2.119          | 12.79          | n.a.         | BMB* |
| 8             | 17.35            | n.a.      | 11.205         | 0.681          | 4.11           | n.a.         | BMB* |
| 9             | 19.65            | n.a.      | 7.514          | 0.476          | 2.87           | n.a.         | BMB* |
| 10            | 21.07            | n.a.      | 24.840         | 1.293          | 7.80           | n.a.         | BMB  |
| 11            | 23.11            | n.a.      | 24.444         | 1.247          | 7.52           | n.a.         | BMB  |
| 12            | 23.33            | n.a.      | 18.072         | 1.039          | 6.27           | n.a.         | BMB  |
| 13            | 24.79            | n.a.      | 21.512         | 1.127          | 6.80           | n.a.         | BMB  |
| 14            | 25.70            | n.a.      | 14.010         | 0.785          | 4.74           | n.a.         | BMB* |
| 15            | 26.85            | n.a.      | 19.155         | 1.249          | 7.54           | n.a.         | BMB  |
| 16            | 28.34            | n.a.      | 0.015          | 0.000          | 0.00           | n.a.         | BMB* |
| 17            | 28.43            | n.a.      | 17.104         | 0.892          | 5.38           | n.a.         | BMB* |
| 18            | 30.04            | n.a.      | 16.053         | 1.007          | 6.08           | n.a.         | BMB  |
| 19            | 31.81            | n.a.      | 19.336         | 1.116          | 6.74           | n.a.         | BMB  |
| <b>Total:</b> |                  |           | <b>284.199</b> | <b>16.570</b>  | <b>100.00</b>  | <b>0.000</b> |      |

Second extraction:

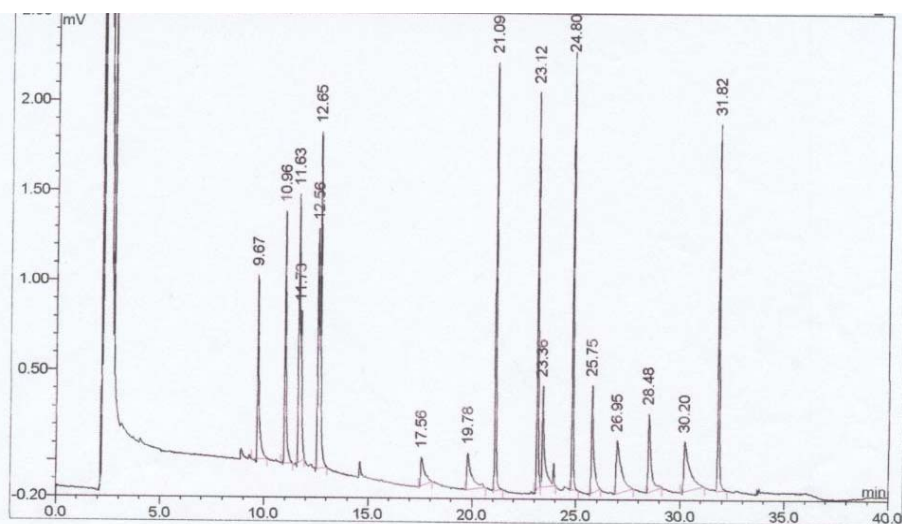

| No.           | Ret. Time<br>min | Peak Name | Height<br>mV | Area<br>mV*min | Rel. Area<br>% | Amount | Type |
|---------------|------------------|-----------|--------------|----------------|----------------|--------|------|
| 1             | 9.67             | n.a.      | 1.023        | 0.087          | 5.24           | n.a.   | BMB* |
| 2             | 10.96            | n.a.      | 1.404        | 0.107          | 6.45           | n.a.   | BMB* |
| 3             | 11.63            | n.a.      | 1.496        | 0.096          | 5.78           | n.a.   | BM * |
| 4             | 11.73            | n.a.      | 0.843        | 0.069          | 4.16           | n.a.   | MB*  |
| 5             | 12.56            | n.a.      | 1.338        | 0.086          | 5.20           | n.a.   | BM * |
| 6             | 12.65            | n.a.      | 1.875        | 0.138          | 8.28           | n.a.   | MB*  |
| 7             | 17.56            | n.a.      | 0.163        | 0.036          | 2.16           | n.a.   | BMB* |
| 8             | 19.78            | n.a.      | 0.206        | 0.056          | 3.35           | n.a.   | BMB* |
| 9             | 21.09            | n.a.      | 2.391        | 0.148          | 8.91           | n.a.   | BMB* |
| 10            | 23.12            | n.a.      | 2.214        | 0.135          | 8.16           | n.a.   | BMB* |
| 11            | 23.36            | n.a.      | 0.568        | 0.083          | 4.98           | n.a.   | BMB* |
| 12            | 24.80            | n.a.      | 2.437        | 0.147          | 8.84           | n.a.   | BMB* |
| 13            | 25.75            | n.a.      | 0.603        | 0.075          | 4.49           | n.a.   | BMB* |
| 14            | 26.95            | n.a.      | 0.300        | 0.083          | 5.02           | n.a.   | BMB* |
| 15            | 28.48            | n.a.      | 0.441        | 0.073          | 4.42           | n.a.   | BMB* |
| 16            | 30.20            | n.a.      | 0.283        | 0.092          | 5.56           | n.a.   | BMB* |
| 17            | 31.82            | n.a.      | 2.044        | 0.150          | 9.00           | n.a.   | BMB* |
| <b>Total:</b> |                  |           | 19.631       | 1.661          | 100.00         | 0.000  |      |

GC graphs for the encapsulation efficiency measurement for microcapsules **B** (1  $\mu$ l sample injection).

First extraction:

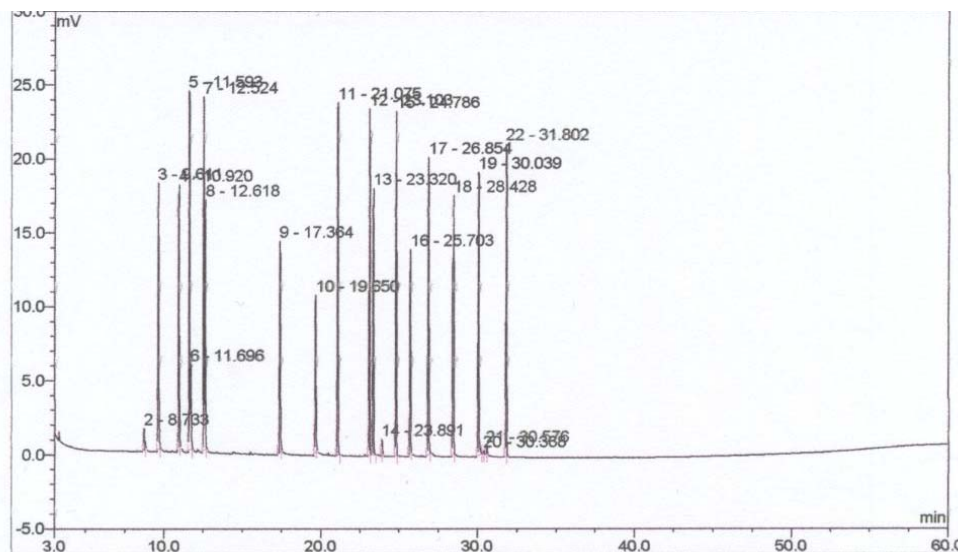

| No.           | Ret.Time<br>min | Peak Name | Height<br>mV | Area<br>mV*min | Rel.Area<br>% | Amount | Type |
|---------------|-----------------|-----------|--------------|----------------|---------------|--------|------|
| 1             | 2.45            | n.a.      | 71.299       | 2.257          | 11.71         | n.a.   | BMB* |
| 2             | 8.73            | n.a.      | 1.487        | 0.085          | 0.44          | n.a.   | BMB* |
| 3             | 9.61            | n.a.      | 18.025       | 0.918          | 4.76          | n.a.   | BMB* |
| 4             | 10.92           | n.a.      | 17.853       | 0.906          | 4.70          | n.a.   | BMB* |
| 5             | 11.59           | n.a.      | 24.322       | 1.170          | 6.07          | n.a.   | BM * |
| 6             | 11.70           | n.a.      | 5.774        | 0.347          | 1.80          | n.a.   | MB*  |
| 7             | 12.52           | n.a.      | 24.008       | 1.132          | 5.87          | n.a.   | BM * |
| 8             | 12.62           | n.a.      | 16.932       | 0.882          | 4.58          | n.a.   | MB*  |
| 9             | 17.36           | n.a.      | 14.383       | 0.812          | 4.21          | n.a.   | BMB* |
| 10            | 19.65           | n.a.      | 10.717       | 0.618          | 3.21          | n.a.   | BMB* |
| 11            | 21.07           | n.a.      | 23.860       | 1.230          | 6.38          | n.a.   | BMB  |
| 12            | 23.10           | n.a.      | 23.442       | 1.223          | 6.35          | n.a.   | BMB  |
| 13            | 23.32           | n.a.      | 18.032       | 1.023          | 5.31          | n.a.   | BMB  |
| 14            | 23.89           | n.a.      | 1.026        | 0.053          | 0.27          | n.a.   | BMB* |
| 15            | 24.79           | n.a.      | 23.257       | 1.230          | 6.38          | n.a.   | BMB  |
| 16            | 25.70           | n.a.      | 13.843       | 0.769          | 3.99          | n.a.   | BMB* |
| 17            | 26.85           | n.a.      | 20.163       | 1.246          | 6.47          | n.a.   | BMB  |
| 18            | 28.43           | n.a.      | 17.565       | 0.984          | 5.11          | n.a.   | BMB* |
| 19            | 30.04           | n.a.      | 19.189       | 1.157          | 6.00          | n.a.   | BMB  |
| 20            | 30.37           | n.a.      | 0.231        | 0.011          | 0.06          | n.a.   | BMB* |
| 21            | 30.58           | n.a.      | 0.576        | 0.030          | 0.16          | n.a.   | BMB* |
| 22            | 31.80           | n.a.      | 21.107       | 1.192          | 6.19          | n.a.   | BMB  |
| <b>Total:</b> |                 |           | 387.091      | 19.276         | 100.00        | 0.000  |      |

Second extraction:

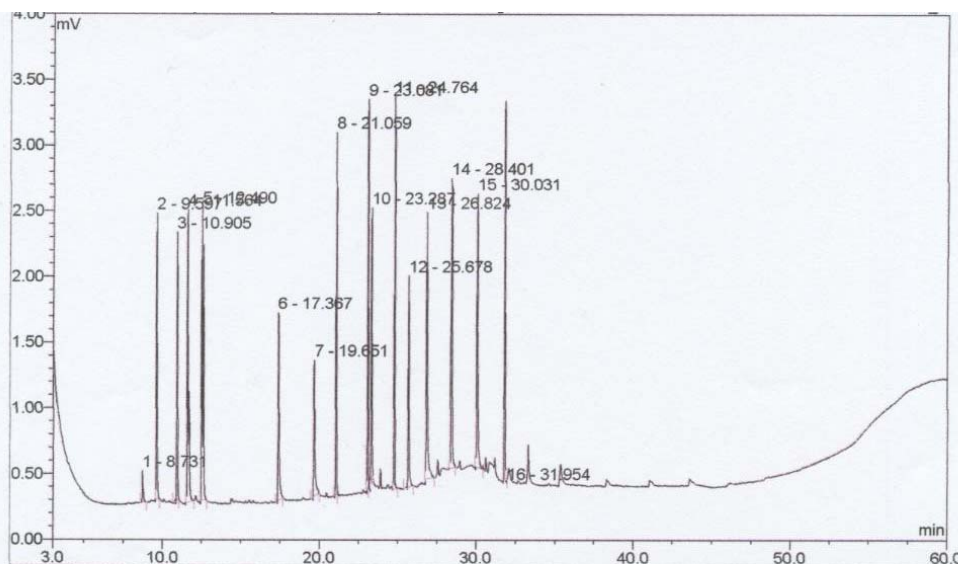

| No.           | Ret. Time<br>min | Peak Name | Height<br>mV | Area<br>mV*min | Rel. Area<br>% | Amount | Type |
|---------------|------------------|-----------|--------------|----------------|----------------|--------|------|
| 1             | 8.73             | n.a.      | 0.249        | 0.016          | 0.78           | n.a.   | BMB* |
| 2             | 9.60             | n.a.      | 2.177        | 0.124          | 5.99           | n.a.   | BMB* |
| 3             | 10.91            | n.a.      | 2.049        | 0.115          | 5.57           | n.a.   | BMB* |
| 4             | 11.56            | n.a.      | 2.241        | 0.198          | 9.56           | n.a.   | BMB* |
| 5             | 12.49            | n.a.      | 2.238        | 0.240          | 11.62          | n.a.   | BMB* |
| 6             | 17.37            | n.a.      | 1.438        | 0.113          | 5.46           | n.a.   | BMB* |
| 7             | 19.65            | n.a.      | 1.041        | 0.089          | 4.30           | n.a.   | BMB* |
| 8             | 21.06            | n.a.      | 2.764        | 0.151          | 7.28           | n.a.   | BMB* |
| 9             | 23.08            | n.a.      | 2.973        | 0.155          | 7.48           | n.a.   | BMB* |
| 10            | 23.29            | n.a.      | 2.110        | 0.123          | 5.93           | n.a.   | BMB* |
| 11            | 24.76            | n.a.      | 3.000        | 0.162          | 7.83           | n.a.   | BMB* |
| 12            | 25.68            | n.a.      | 1.613        | 0.105          | 5.08           | n.a.   | BMB* |
| 13            | 26.82            | n.a.      | 2.037        | 0.173          | 8.35           | n.a.   | BMB* |
| 14            | 28.40            | n.a.      | 2.216        | 0.143          | 6.91           | n.a.   | BMB* |
| 15            | 30.03            | n.a.      | 2.083        | 0.161          | 7.78           | n.a.   | BMB* |
| 16            | 31.95            | n.a.      | 0.027        | 0.002          | 0.10           | n.a.   | BMB* |
| <b>Total:</b> |                  |           | 30.254       | 2.069          | 100.00         | 0.000  |      |

GC graphs for the encapsulation efficiency measurement for microcapsules C (1  $\mu$ l sample injection).

First extraction

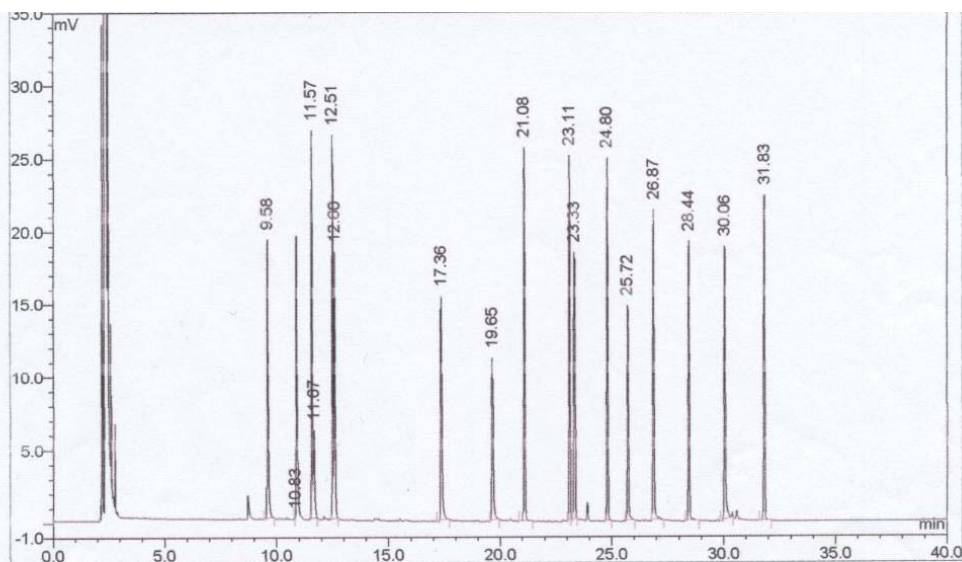

| No.           | Ret.Time<br>min | Peak Name | Height<br>mV | Area<br>mV*min | Rel.Area<br>% | Amount | Type |
|---------------|-----------------|-----------|--------------|----------------|---------------|--------|------|
| 1             | 9.58            | n.a.      | 19.200       | 1.018          | 5.86          | n.a.   | BMB* |
| 2             | 10.83           | n.a.      | 0.028        | 0.000          | 0.00          | n.a.   | BMB* |
| 3             | 11.57           | n.a.      | 26.673       | 1.313          | 7.56          | n.a.   | BM * |
| 4             | 11.67           | n.a.      | 6.081        | 0.354          | 2.04          | n.a.   | MB*  |
| 5             | 12.51           | n.a.      | 26.358       | 1.262          | 7.27          | n.a.   | BM * |
| 6             | 12.60           | n.a.      | 18.365       | 0.946          | 5.45          | n.a.   | MB*  |
| 7             | 17.36           | n.a.      | 15.374       | 0.915          | 5.27          | n.a.   | BMB* |
| 8             | 19.65           | n.a.      | 11.185       | 0.718          | 4.14          | n.a.   | BMB* |
| 9             | 21.08           | n.a.      | 25.635       | 1.335          | 7.69          | n.a.   | BMB* |
| 10            | 23.11           | n.a.      | 24.991       | 1.292          | 7.44          | n.a.   | BMB* |
| 11            | 23.33           | n.a.      | 18.318       | 1.072          | 6.18          | n.a.   | BMB* |
| 12            | 24.80           | n.a.      | 24.925       | 1.317          | 7.58          | n.a.   | BMB* |
| 13            | 25.72           | n.a.      | 14.743       | 0.876          | 5.04          | n.a.   | BMB* |
| 14            | 26.87           | n.a.      | 21.300       | 1.362          | 7.84          | n.a.   | BMB* |
| 15            | 28.44           | n.a.      | 19.184       | 1.079          | 6.21          | n.a.   | BMB* |
| 16            | 30.06           | n.a.      | 18.791       | 1.215          | 6.99          | n.a.   | BMB* |
| 17            | 31.83           | n.a.      | 22.348       | 1.289          | 7.42          | n.a.   | BMB* |
| <b>Total:</b> |                 |           | 313.500      | 17.364         | 100.00        | 0.000  |      |

Second extraction:

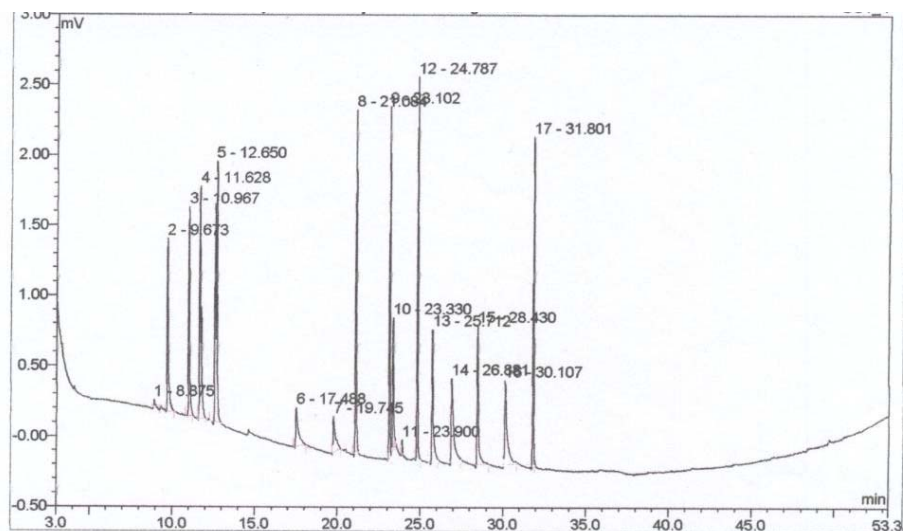

| No.           | Ret.Time<br>min | Peak Name | Height<br>mV | Area<br>mV*min | Rel.Area<br>% | Amount | Type |
|---------------|-----------------|-----------|--------------|----------------|---------------|--------|------|
| 1             | 8.88            | n.a.      | 0.049        | 0.001          | 0.04          | n.a.   | BMB* |
| 2             | 9.67            | n.a.      | 1.241        | 0.101          | 5.81          | n.a.   | BMB* |
| 3             | 10.97           | n.a.      | 1.490        | 0.107          | 6.18          | n.a.   | BMB* |
| 4             | 11.63           | n.a.      | 1.653        | 0.174          | 10.03         | n.a.   | BMB* |
| 5             | 12.65           | n.a.      | 1.858        | 0.220          | 12.73         | n.a.   | BMB* |
| 6             | 17.49           | n.a.      | 0.281        | 0.053          | 3.06          | n.a.   | BMB* |
| 7             | 19.75           | n.a.      | 0.262        | 0.045          | 2.61          | n.a.   | BMB* |
| 8             | 21.08           | n.a.      | 2.434        | 0.141          | 8.17          | n.a.   | BMB* |
| 9             | 23.10           | n.a.      | 2.508        | 0.144          | 8.31          | n.a.   | BMB* |
| 10            | 23.33           | n.a.      | 0.956        | 0.066          | 3.80          | n.a.   | bMB* |
| 11            | 23.90           | n.a.      | 0.095        | 0.005          | 0.26          | n.a.   | BMB* |
| 12            | 24.79           | n.a.      | 2.719        | 0.151          | 8.71          | n.a.   | BMB* |
| 13            | 25.71           | n.a.      | 0.940        | 0.083          | 4.79          | n.a.   | BMB* |
| 14            | 26.88           | n.a.      | 0.595        | 0.092          | 5.29          | n.a.   | BMB* |
| 15            | 28.43           | n.a.      | 0.987        | 0.097          | 5.60          | n.a.   | BMB* |
| 16            | 30.11           | n.a.      | 0.612        | 0.107          | 6.19          | n.a.   | BMB* |
| 17            | 31.80           | n.a.      | 2.340        | 0.145          | 8.39          | n.a.   | BMB* |
| <b>Total:</b> |                 |           | 21.020       | 1.731          | 100.00        | 0.000  |      |



GC graphs for the encapsulation efficiency measurement for microcapsules **D** (1  $\mu$ l sample injection).

First extraction

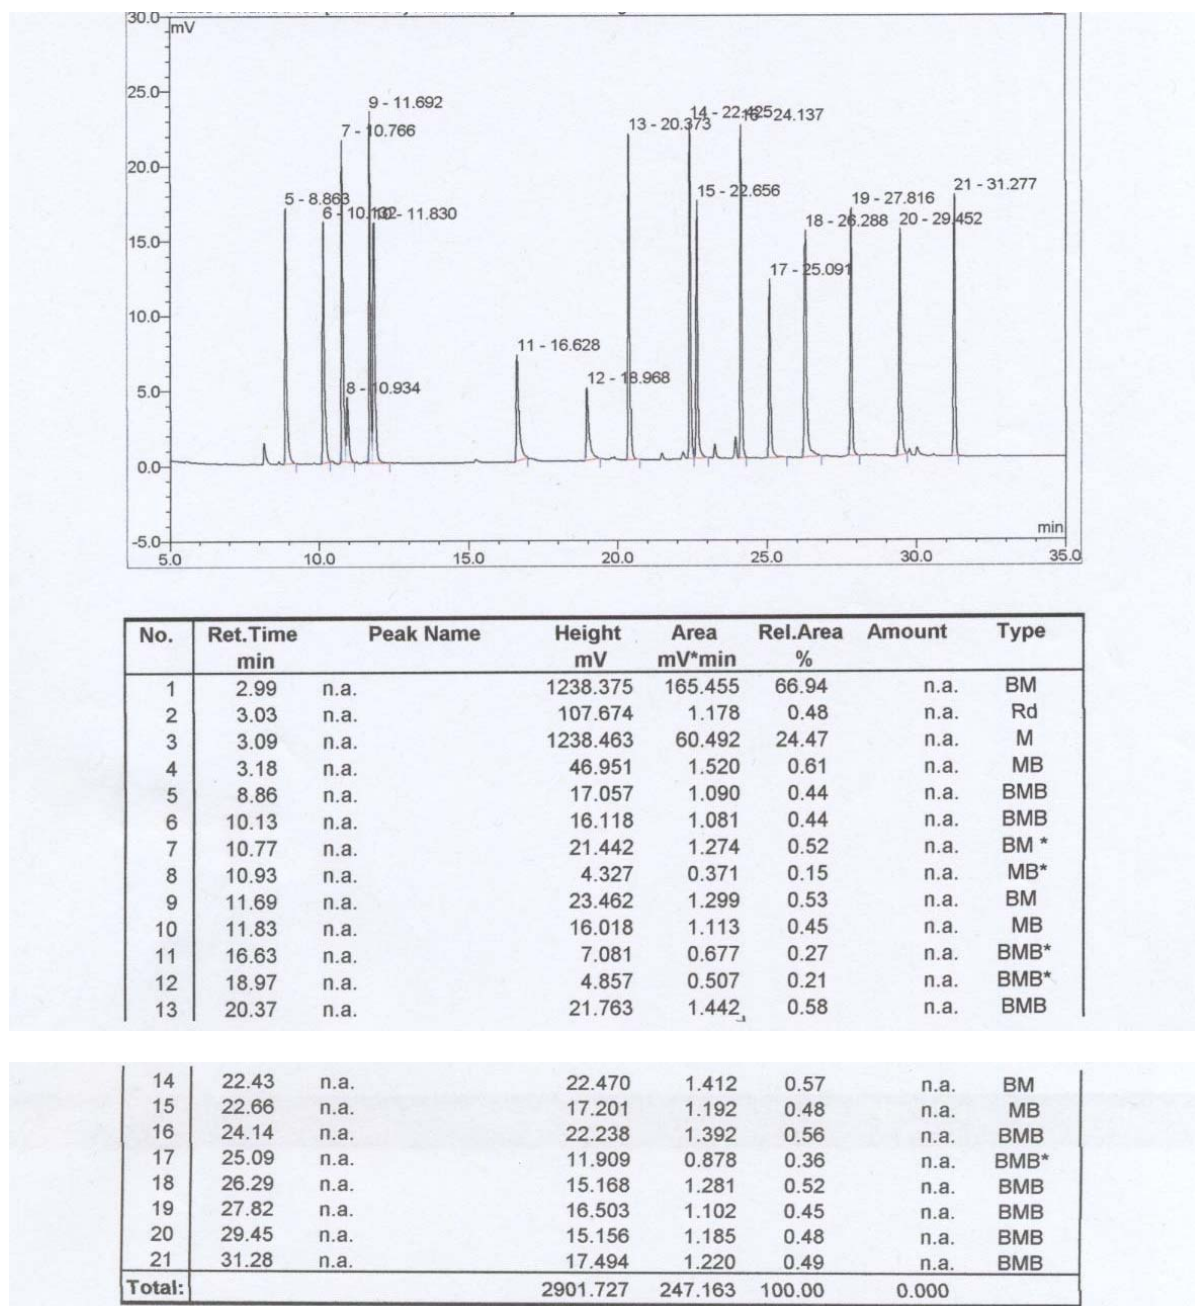

## Second extraction

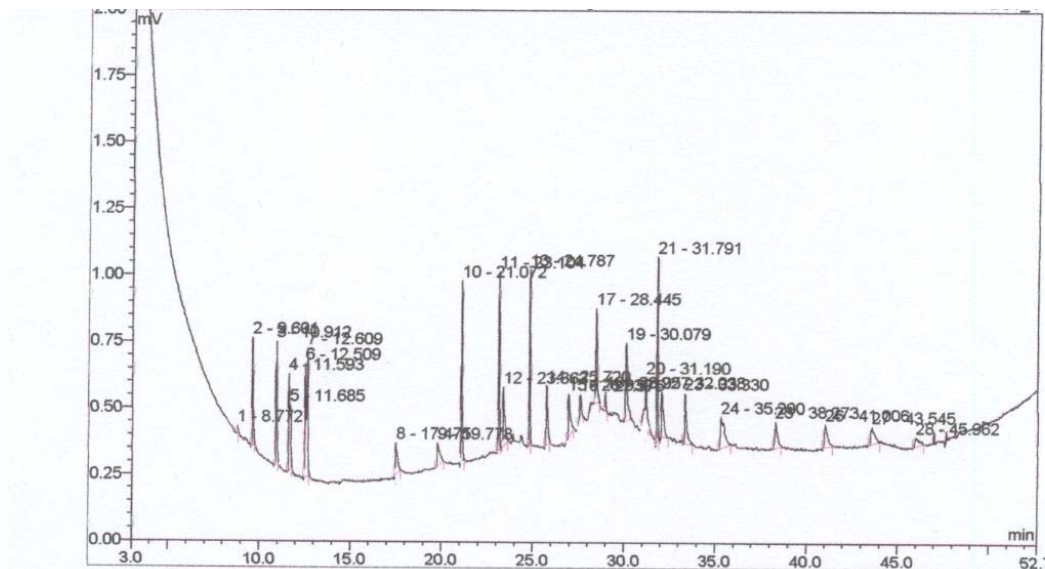

| No. | Ret.Time<br>min | Peak Name | Height<br>mV | Area<br>mV*min | Rel.Area<br>% | Amount | Type |
|-----|-----------------|-----------|--------------|----------------|---------------|--------|------|
| 1   | 8.77            | n.a.      | 0.032        | 0.003          | 0.37          | n.a.   | BMB* |
| 2   | 9.60            | n.a.      | 0.409        | 0.026          | 3.81          | n.a.   | BMB* |
| 3   | 10.91           | n.a.      | 0.466        | 0.029          | 4.19          | n.a.   | BMB* |
| 4   | 11.59           | n.a.      | 0.371        | 0.027          | 3.89          | n.a.   | BM * |
| 5   | 11.69           | n.a.      | 0.246        | 0.015          | 2.24          | n.a.   | MB*  |
| 6   | 12.51           | n.a.      | 0.429        | 0.027          | 3.97          | n.a.   | BM * |
| 7   | 12.61           | n.a.      | 0.485        | 0.032          | 4.70          | n.a.   | MB*  |
| 8   | 17.48           | n.a.      | 0.124        | 0.016          | 2.38          | n.a.   | BMB* |
| 9   | 19.78           | n.a.      | 0.091        | 0.016          | 2.39          | n.a.   | BMB* |
| 10  | 21.07           | n.a.      | 0.682        | 0.042          | 6.12          | n.a.   | BMB* |
| 11  | 23.10           | n.a.      | 0.676        | 0.041          | 6.02          | n.a.   | BMB* |
| 12  | 23.36           | n.a.      | 0.229        | 0.025          | 3.72          | n.a.   | BMB* |
| 13  | 24.79           | n.a.      | 0.669        | 0.038          | 5.60          | n.a.   | BMB* |

|               |       |      |              |              |               |              |      |
|---------------|-------|------|--------------|--------------|---------------|--------------|------|
| 14            | 25.72 | n.a. | 0.227        | 0.021        | 3.13          | n.a.         | BMB* |
| 15            | 26.94 | n.a. | 0.171        | 0.024        | 3.57          | n.a.         | BMB* |
| 16            | 27.58 | n.a. | 0.118        | 0.018        | 2.70          | n.a.         | BMB* |
| 17            | 28.45 | n.a. | 0.357        | 0.030        | 4.42          | n.a.         | BMB* |
| 18            | 28.96 | n.a. | 0.075        | 0.004        | 0.65          | n.a.         | BMB* |
| 19            | 30.08 | n.a. | 0.292        | 0.031        | 4.61          | n.a.         | BMB* |
| 20            | 31.19 | n.a. | 0.187        | 0.030        | 4.34          | n.a.         | BMB* |
| 21            | 31.79 | n.a. | 0.700        | 0.041        | 6.08          | n.a.         | BMB* |
| 22            | 32.04 | n.a. | 0.171        | 0.025        | 3.68          | n.a.         | BMB* |
| 23            | 33.33 | n.a. | 0.189        | 0.022        | 3.27          | n.a.         | BMB* |
| 24            | 35.29 | n.a. | 0.122        | 0.032        | 4.66          | n.a.         | BMB* |
| 25            | 38.27 | n.a. | 0.105        | 0.018        | 2.66          | n.a.         | BMB* |
| 26            | 41.01 | n.a. | 0.090        | 0.018        | 2.63          | n.a.         | BMB* |
| 27            | 43.55 | n.a. | 0.069        | 0.018        | 2.63          | n.a.         | BMB* |
| 28            | 45.96 | n.a. | 0.038        | 0.011        | 1.59          | n.a.         | BMB* |
| <b>Total:</b> |       |      | <b>7.820</b> | <b>0.682</b> | <b>100.00</b> | <b>0.000</b> |      |

GC graphs for the encapsulation efficiency measurement for microcapsules E (1  $\mu$ l sample injection).

First extraction

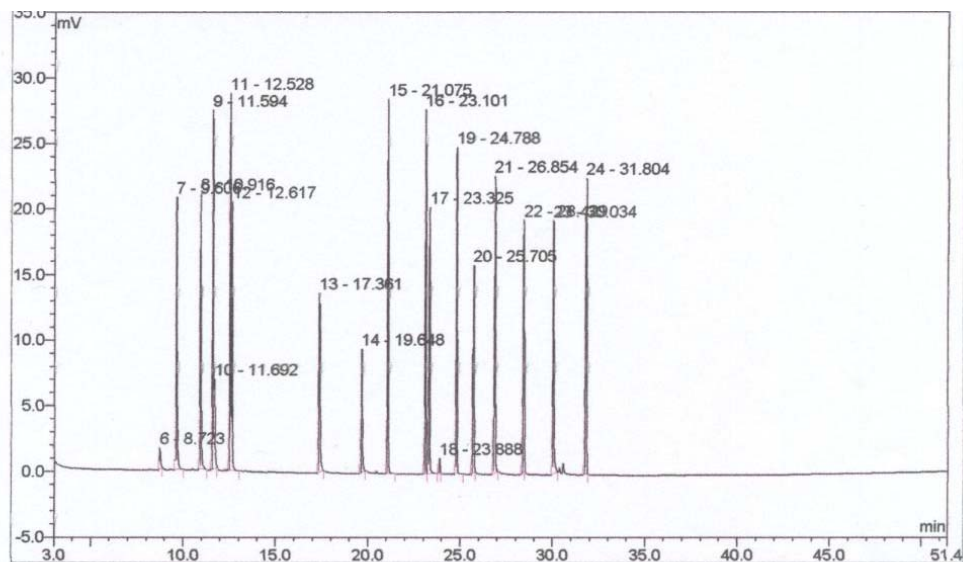

| No.           | Ret.Time<br>min | Peak Name | Height<br>mV    | Area<br>mV*min | Rel.Area<br>% | Amount       | Type |
|---------------|-----------------|-----------|-----------------|----------------|---------------|--------------|------|
| 1             | 2.29            | n.a.      | 495.885         | 9.157          | 8.55          | n.a.         | BM   |
| 2             | 2.32            | n.a.      | 144.501         | 1.796          | 1.68          | n.a.         | Ru   |
| 3             | 2.37            | n.a.      | 1143.586        | 72.478         | 67.65         | n.a.         | Mb   |
| 4             | 2.41            | n.a.      | 109.244         | 1.667          | 1.56          | n.a.         | bMB  |
| 5             | 2.45            | n.a.      | 162.325         | 2.799          | 2.61          | n.a.         | BMB  |
| 6             | 8.72            | n.a.      | 1.677           | 0.115          | 0.11          | n.a.         | BMB* |
| 7             | 9.61            | n.a.      | 20.777          | 1.088          | 1.02          | n.a.         | BMB  |
| 8             | 10.92           | n.a.      | 20.997          | 1.126          | 1.05          | n.a.         | BMB  |
| 9             | 11.59           | n.a.      | 27.391          | 1.381          | 1.29          | n.a.         | BM * |
| 10            | 11.69           | n.a.      | 6.867           | 0.338          | 0.32          | n.a.         | MB*  |
| 11            | 12.53           | n.a.      | 28.797          | 1.343          | 1.25          | n.a.         | BM   |
| 12            | 12.62           | n.a.      | 20.506          | 1.110          | 1.04          | n.a.         | MB   |
| 13            | 17.36           | n.a.      | 13.694          | 0.821          | 0.77          | n.a.         | BMB* |
| 14            | 19.65           | n.a.      | 9.432           | 0.581          | 0.54          | n.a.         | BMB* |
| 15            | 21.07           | n.a.      | 28.545          | 1.468          | 1.37          | n.a.         | BMB  |
| 16            | 23.10           | n.a.      | 27.765          | 1.439          | 1.34          | n.a.         | BM   |
| 17            | 23.33           | n.a.      | 20.301          | 1.230          | 1.15          | n.a.         | MB   |
| 18            | 23.89           | n.a.      | 1.150           | 0.064          | 0.06          | n.a.         | BMB* |
| 19            | 24.79           | n.a.      | 24.909          | 1.305          | 1.22          | n.a.         | BMB  |
| 20            | 25.70           | n.a.      | 15.884          | 0.903          | 0.84          | n.a.         | BMB* |
| 21            | 26.85           | n.a.      | 22.696          | 1.399          | 1.31          | n.a.         | BMB  |
| 22            | 28.43           | n.a.      | 19.250          | 1.039          | 0.97          | n.a.         | BMB  |
| 23            | 30.03           | n.a.      | 19.311          | 1.194          | 1.11          | n.a.         | BMB  |
| 24            | 31.80           | n.a.      | 22.574          | 1.292          | 1.21          | n.a.         | BMB  |
| <b>Total:</b> |                 |           | <b>2408.062</b> | <b>107.135</b> | <b>100.00</b> | <b>0.000</b> |      |

## Second extraction

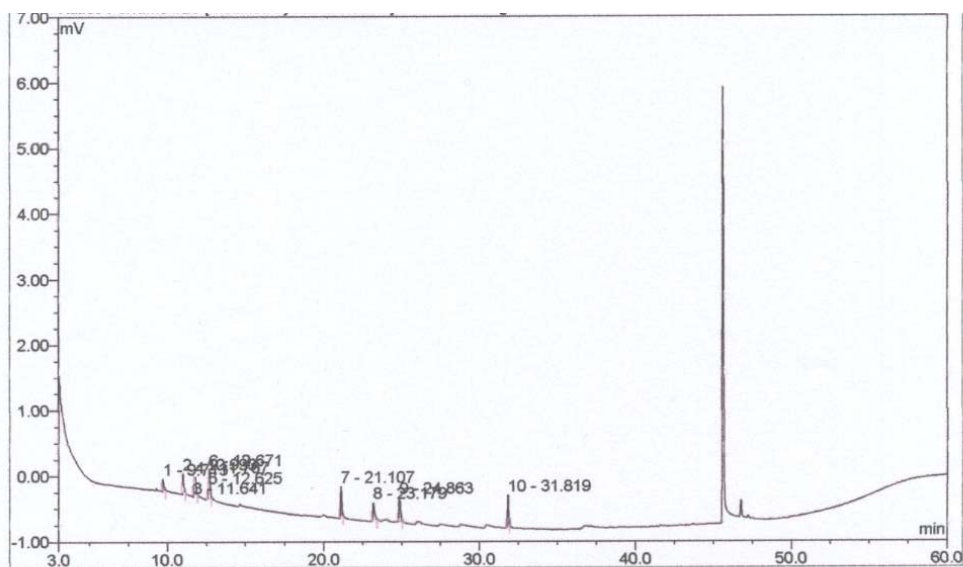

| No.           | Ret.Time<br>min | Peak Name | Height<br>mV | Area<br>mV*min | Rel.Area<br>% | Amount | Type |
|---------------|-----------------|-----------|--------------|----------------|---------------|--------|------|
| 1             | 9.71            | n.a.      | 0.190        | 0.016          | 6.05          | n.a.   | BMB* |
| 2             | 10.99           | n.a.      | 0.286        | 0.020          | 7.66          | n.a.   | BMB* |
| 3             | 11.64           | n.a.      | 0.022        | 0.008          | 3.15          | n.a.   | BM * |
| 4             | 11.77           | n.a.      | 0.281        | 0.025          | 9.61          | n.a.   | MB*  |
| 5             | 12.63           | n.a.      | 0.187        | 0.008          | 3.05          | n.a.   | BM * |
| 6             | 12.67           | n.a.      | 0.449        | 0.038          | 14.52         | n.a.   | MB*  |
| 7             | 21.11           | n.a.      | 0.472        | 0.038          | 14.62         | n.a.   | BMB* |
| 8             | 23.18           | n.a.      | 0.269        | 0.032          | 12.42         | n.a.   | BMB* |
| 9             | 24.86           | n.a.      | 0.377        | 0.039          | 14.99         | n.a.   | BMB* |
| 10            | 31.82           | n.a.      | 0.478        | 0.036          | 13.92         | n.a.   | BMB* |
| <b>Total:</b> |                 |           | 3.012        | 0.261          | 100.00        | 0.000  |      |
